# Supplementary material
Source: PubMed Central journal article supplement (PMC6375783)
Supplement: NIHMS1516537-supplement-1.pdf [file NIHMS1516537-supplement-1.pdf]

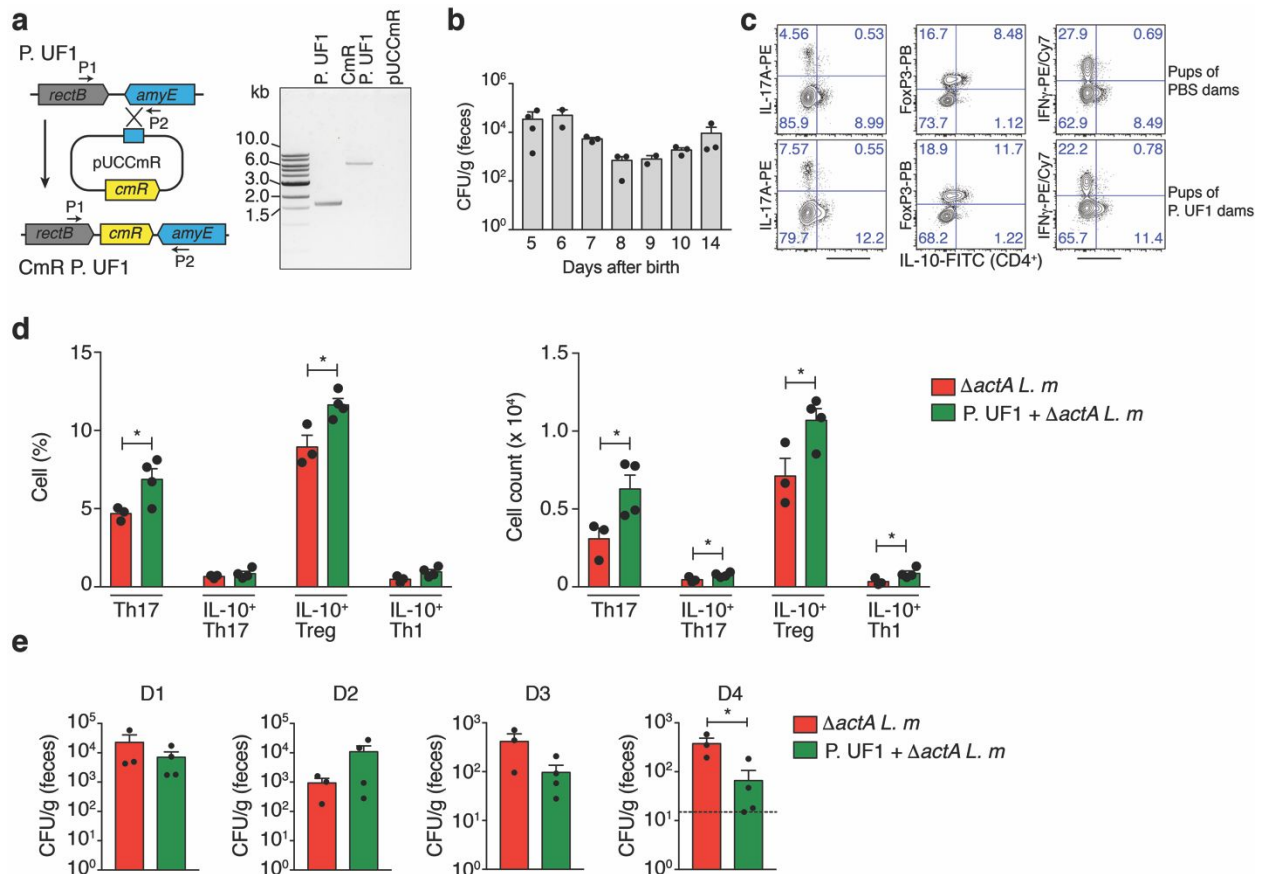

**Supplementary Fig. 1** Maternal effects mediated by P. UF1. **a** Genetic construction of antibiotic-resistant P. UF1 strain. The chloramphenicol resistant gene (*CmR*) was inserted into the non-essential region downstream of alpha-amylase gene (*amyE*) by homologous recombination, resulting in CmR P. UF1 strain. PCR identification of chromosomal insertion using primers P1 and P2 is shown. **b** C57BL/6 dams were gavaged with CmR P. UF1 ( $10^9$  CFU/dam, twice a week) during pregnancy. After birth, newborn mice were kept with their mothers that were gavaged with CmR P. UF1. Newborn mice ( $n = 2-3$ ) were sacrificed at days 5-14 to collect luminal contents. The CmR P. UF1-transfer into the newborn mice was determined by plating the fecal contents on the chloramphenicol-resistant MRS-lactate agar plates. **c-e** C57BL/6 dams were gavaged with P. UF1 ( $10^9$  CFU/dam, twice a week), or PBS during pregnancy. After birth, newborn mice were not gavaged with P. UF1, or PBS and kept 21 days with their mothers that were gavaged with P. UF1 ( $10^9$  CFU/dam, twice a week), or PBS. Newborn mice ( $n = 3-4$ ) were then orally infected with  $\Delta actA$  L. m ( $10^8$  CFU/mouse) and

ethanized 7 days post infection to analyze colonic CD4<sup>+</sup> T cell response. **(c)** Representative flow plots for colonic IL-10<sup>+</sup> Th17, IL-10<sup>+</sup> FoxP3<sup>+</sup> Tregs and IL-10<sup>+</sup> IFN $\gamma$ <sup>+</sup> Th1 cells. **(d)** Frequency and total counts of colonic Th17, IL-10<sup>+</sup> Th17, IL-10<sup>+</sup> FoxP3<sup>+</sup> Tregs and IL-10<sup>+</sup> IFN $\gamma$ <sup>+</sup> Th1 cells from newborn mice delivered by P. UF1- or PBS-gavaged dams. **(e)** Bacterial burdens of  $\Delta actA$  *L. m* in feces of new mice. Dash line indicates the limit of detection. Data are from 1 experiment **(c-e)**, or pooled from 3 experiments **(b)**. Data are presented as mean  $\pm$  SEM; \*  $p < 0.05$ , 2-tailed unpaired *t*-test.

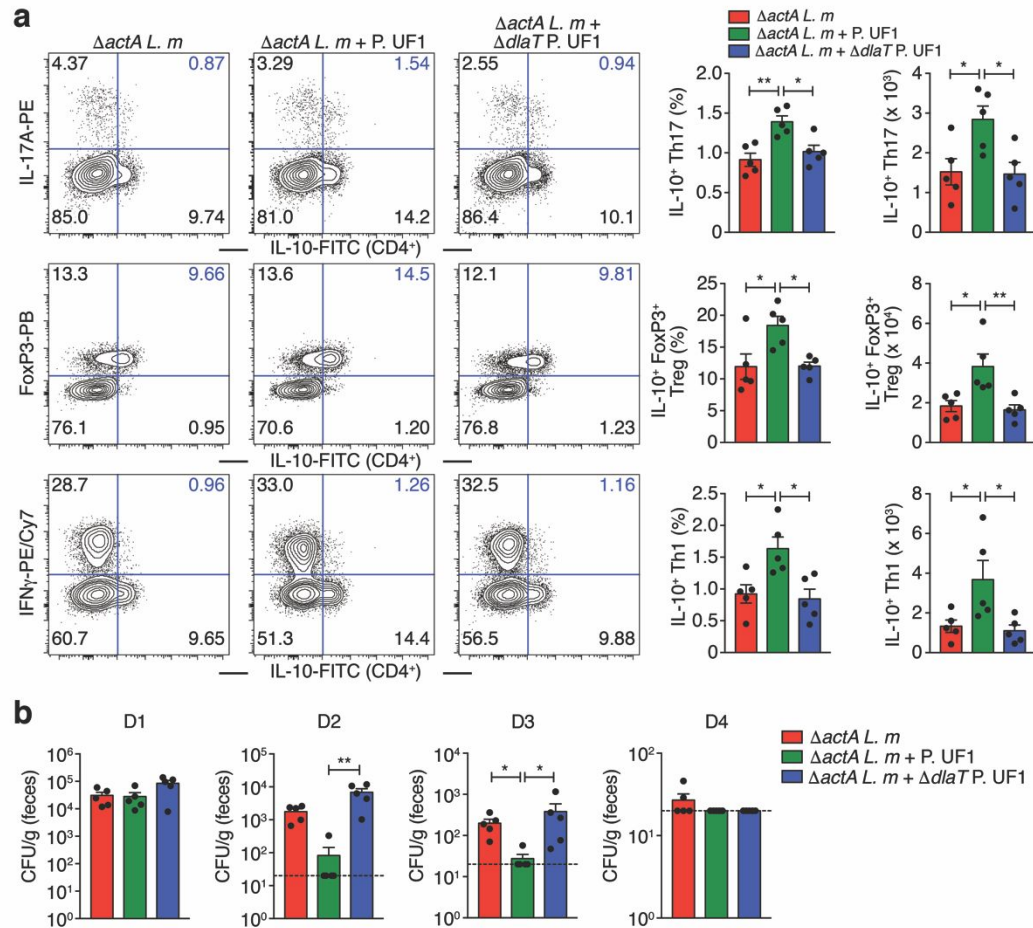

**Supplementary Fig. 2** T helper cells induced by P. UF1 protect neonatal mice against *L. m* infection. Pregnant C57BL/6 dams were gavaged weekly with P. UF1,  $\Delta dlaT$  P. UF1 ( $10^9$  CFU/dam) or PBS. After birth, newborn mice of the respective dams were gavaged weekly with P. UF1,  $\Delta dlaT$  P. UF1 ( $10^7$  CFU/mouse), or PBS during breastfeeding. After weaning, mice continued to receive one gavage of P. UF1,  $\Delta dlaT$  P. UF1 ( $10^8$  CFU/mouse), or PBS. One day after the last gavage, mice ( $n = 5$ ) were infected with  $\Delta actA L. m$  ( $10^9$  CFU/mouse) and euthanized 7 days post infection to analyze colonic CD4<sup>+</sup> T cell responses. **a** Representative flow plots, frequency and total cell counts of IL-10<sup>+</sup> Th17, IL-10<sup>+</sup> FoxP3<sup>+</sup> Treg and IL-10<sup>+</sup> IFN $\gamma$ <sup>+</sup> Th1 cells. **b** Bacterial burdens of  $\Delta actA L. m$  in feces of mice from the indicated groups. Dash lines indicate the limit of detection. Data are from 1 experiment and presented as mean  $\pm$  SEM; \*  $p < 0.05$ , ANOVA plus Tukey post-test (**a**) or Kruskal-Wallis test (**b**).

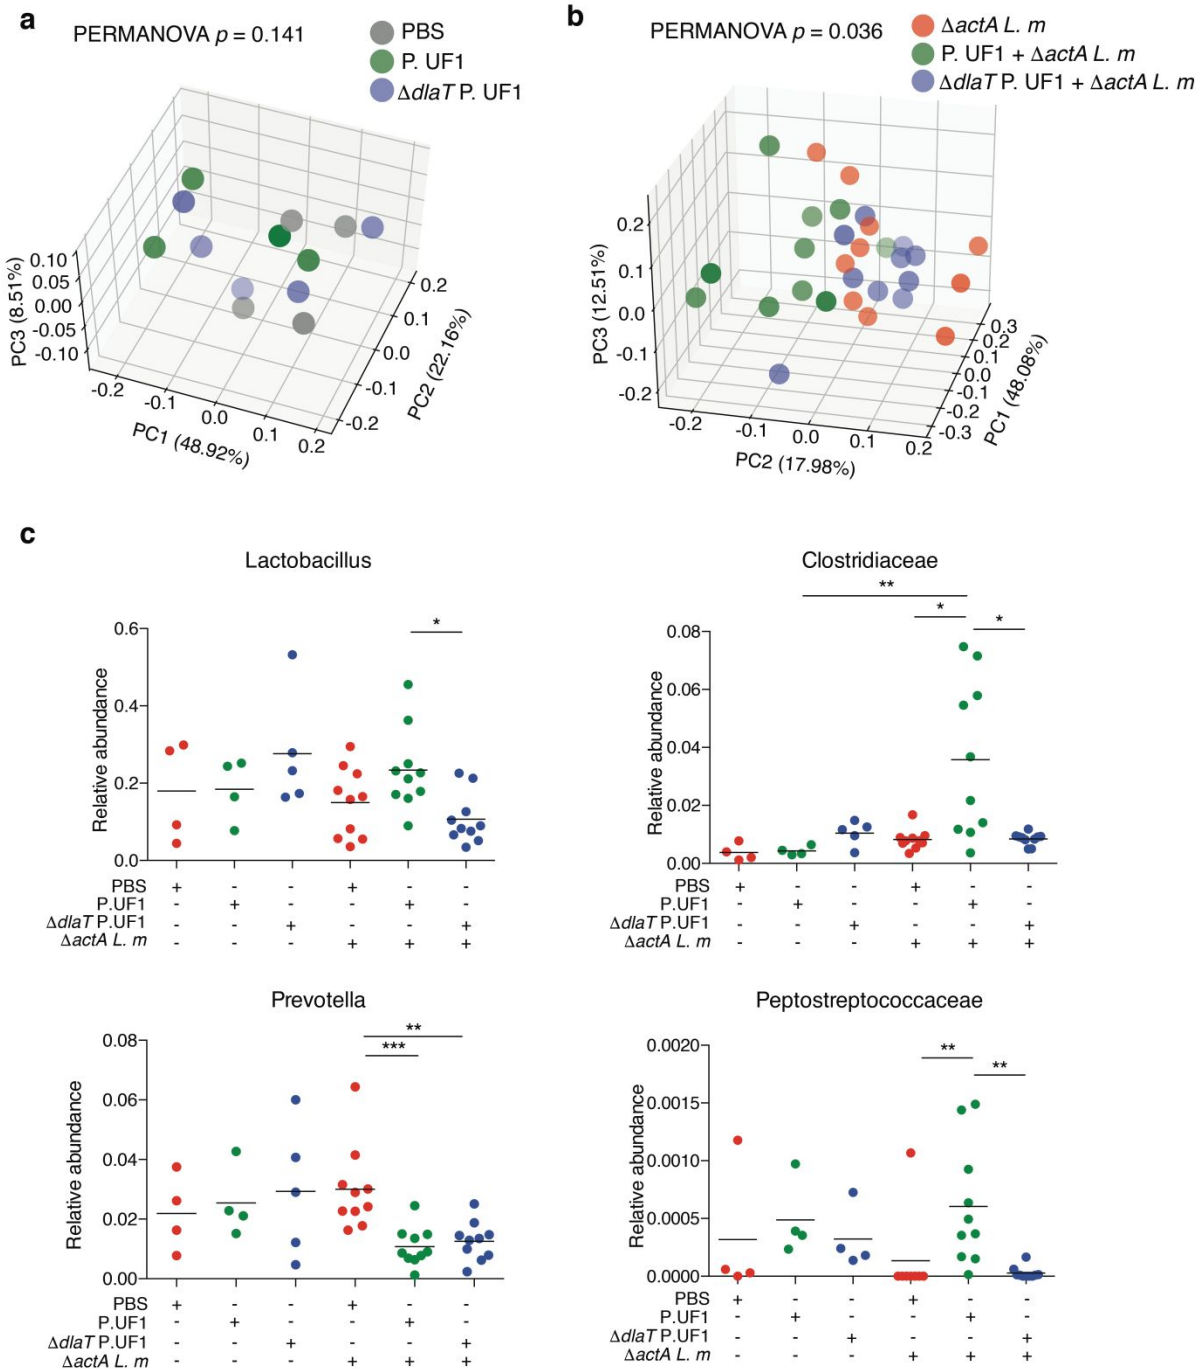

**Supplementary Fig. 3** P. UF1 modulates the microbiota composition during  $\Delta actA$  *L. m* infection. **a** Pregnant C57BL/6 dams were gavaged weekly with P. UF1,  $\Delta dlaT$  P. UF1 ( $10^9$  CFU/dam), or PBS. After birth, newborn mice ( $n = 4-5$ ) of the respective dams continued to receive PBS, P. UF1, or  $\Delta dlaT$  P. UF1 ( $10^7$  CFU/mouse during breastfeeding,  $10^8$  CFU/mouse

after weaning, once a week) until 8 weeks of age. Fecal samples were collected for microbiota analysis before  $\Delta actA$  *L. m* infection. Principal coordinate analysis (PcoA) plot showing that the fecal microbiomes of the indicated groups were not significantly separated (PERMANOVA test,  $p = 0.141$ ). **b** 8-week-old mice ( $n = 10$ ) receiving the same treatment were orally infected with  $\Delta actA$  *L. m*. 7 days post infection, fecal samples were collected for microbiota analysis. Significant separation of microbial communities derived from mouse groups after  $\Delta actA$  *L. m* infection (PERMANOVA test,  $p = 0.036$ ). **c** Relative abundances of selected taxa in the indicated groups before and after  $\Delta actA$  *L. m* infection. Data are from 1 (**a**), or 2 (**b**) experiments; Data are presented as mean; \*  $p < 0.05$ , \*\*  $p < 0.01$ , \*\*\*  $p < 0.001$ , Kruskal-Wallis test plus Dunn's multiple comparisons test (**c**).

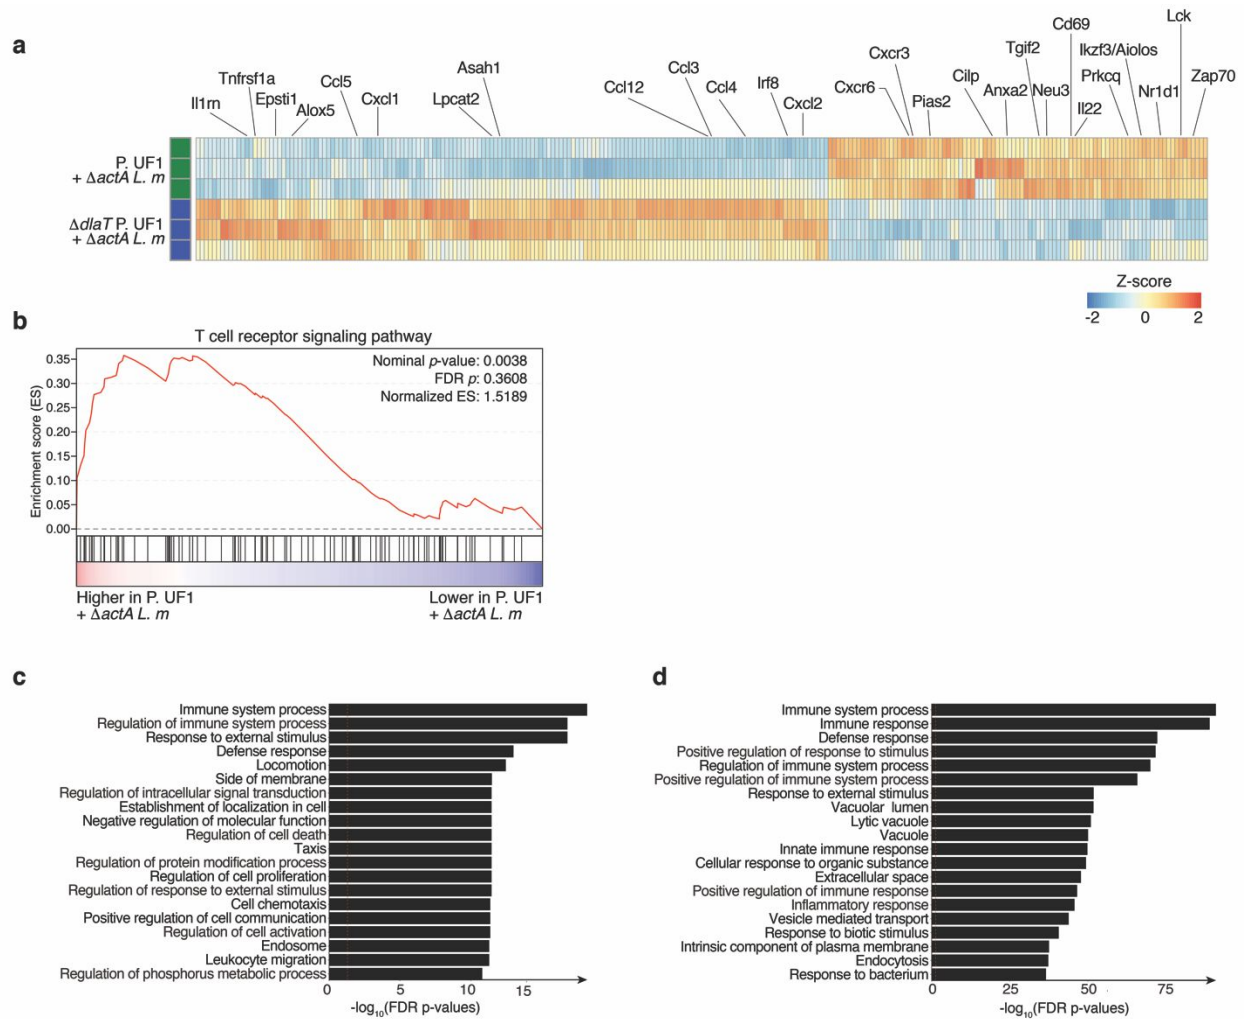

**Supplementary Fig. 4** DlaT-dependent regulation of Th17 cells during  $\Delta actA L. m$  infection. **a** Heatmap of z-scores of regularized-log-transformed normalized counts of genes from sorted Th17 cells isolated from IL-17A<sup>eGFP</sup> mice (filtered by FDR  $p < 0.05$ ). **b** Representative GSEA plot for T cell receptor signaling pathway from KEGG database. **c** Enriched gene sets elevated in Th17 cells derived from P. UF1-gavaged mice compared to Th17 cells isolated from  $\Delta dlaT$  P. UF1-gavaged mice. **d** Enriched gene sets downregulated in P. UF1-induced Th17 cells compared to Th17 cells derived from  $\Delta dlaT$  P. UF1-gavaged mice.

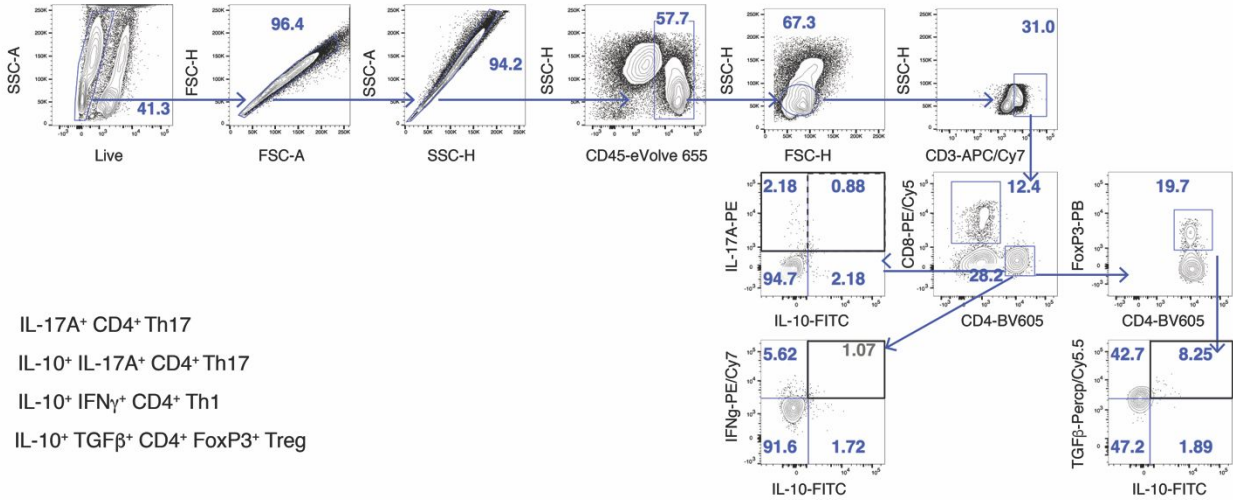

**Supplementary Fig. 5** Flow cytometric gating strategy for Th17, IL-10<sup>+</sup> Th17, IL-10<sup>+</sup> TGF $\beta$ <sup>+</sup> Treg and IL-10<sup>+</sup> IFN $\gamma$ <sup>+</sup> Th1 cells. Colonic cells were isolated, stimulated with PMA/ionomycin, and analyzed using flow cytometry. After dead and doublet cell exclusion, CD45<sup>+</sup> cells were selected. Lymphocytes were gated on FSC-H versus SSC-H followed by CD3<sup>+</sup> and subsequently on CD4<sup>+</sup> CD8<sup>-</sup> events. The cytokine-positive (IL-10<sup>+</sup>, IL-17A<sup>+</sup>, IFN $\gamma$ <sup>+</sup>, TGF $\beta$ <sup>+</sup>) cells in CD4<sup>+</sup> CD8<sup>-</sup> compartment were then evaluated.
